# Supplementary material for: Highly hemo-compatible, mechanically strong, and conductive dual cross-linked polymer hydrogels
Source: Royal Society of Chemistry journal article supplement (doi:10.1039/c6tb02259f), 2016-01-01
Supplement: c6tb02259f1.pdf [file c6tb02259f1.pdf]

## Supporting Information

### A highly hemo-compatible, mechanically strong, and conductive dual cross-linked polymer hydrogel

Weifeng Zhao<sup>1,2</sup>, Zhiyuan Han<sup>3</sup>, Lang Ma<sup>1</sup>, Shudong Sun<sup>1\*</sup>, Changsheng Zhao<sup>1\*</sup>

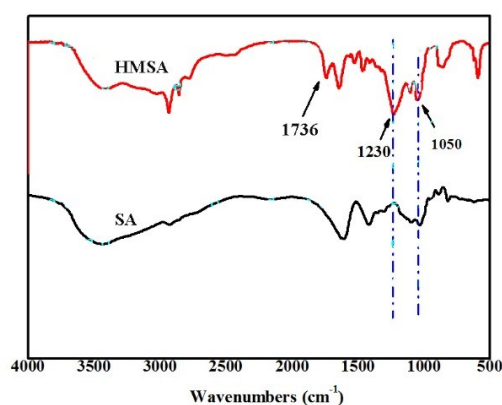

**Figure S1** IR of SA and HMSA.

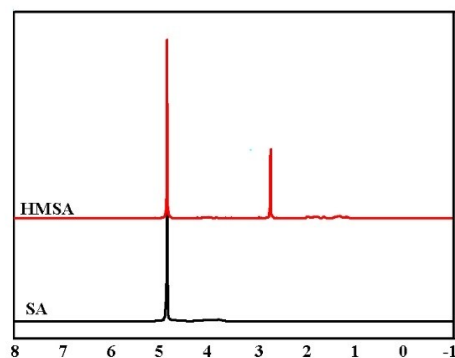

**Figure S2** NMR of SA and HMSA.

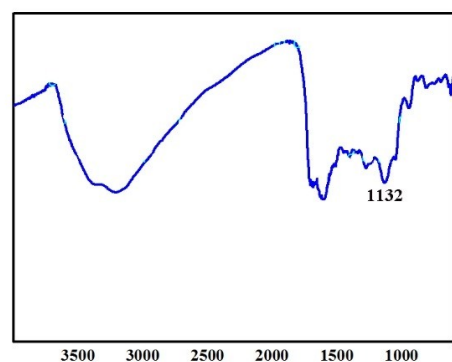

**Figure S3** IR of the HMSA/PAM/PPy hydrogel.

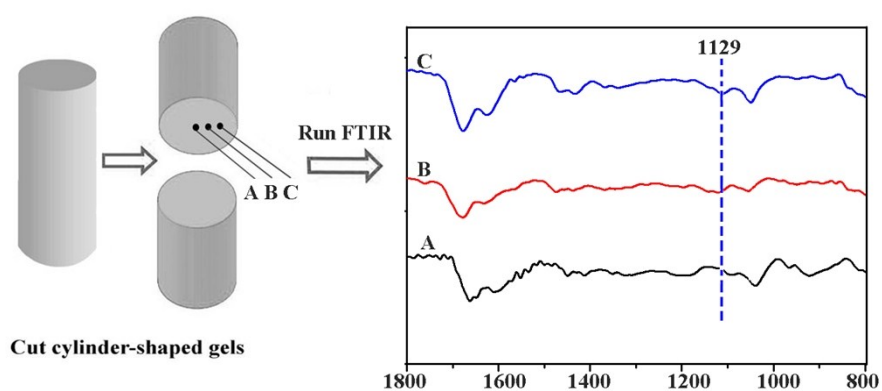

**Figure S4** ATR-FTIR spectra for the hydrogel with PPy, HMSA/PAM/PPy, at different positions through the hydrogels.
